# Supplementary material for: An Inducible TGF-β2-TGFβR Pathway Modulates the Sensitivity of HNSCC Cells to Tyrosine Kinase Inhibitors Targeting Dominant Receptor Tyrosine Kinases
Source: PubMed Central journal article supplement (PMC4422719; doi:10.1371/journal.pone.0123600), 2015-05-06

UMSCC25

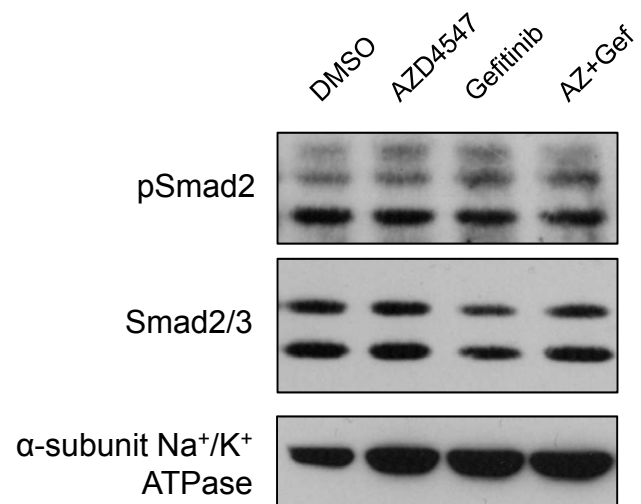

Supplement: pone.0123600.s003.pdf [file pone.0123600.s003.pdf]
