# Supplementary material for: An Inducible TGF-β2-TGFβR Pathway Modulates the Sensitivity of HNSCC Cells to Tyrosine Kinase Inhibitors Targeting Dominant Receptor Tyrosine Kinases
Source: PubMed Central journal article supplement (PMC4422719; doi:10.1371/journal.pone.0123600), 2015-05-06

293T

UMSCC25

Control

TGF- $\beta$ 2

Control

AZD4547

Gefitinib

AZ+Gef

TGF- $\beta$ 2

pSmad2

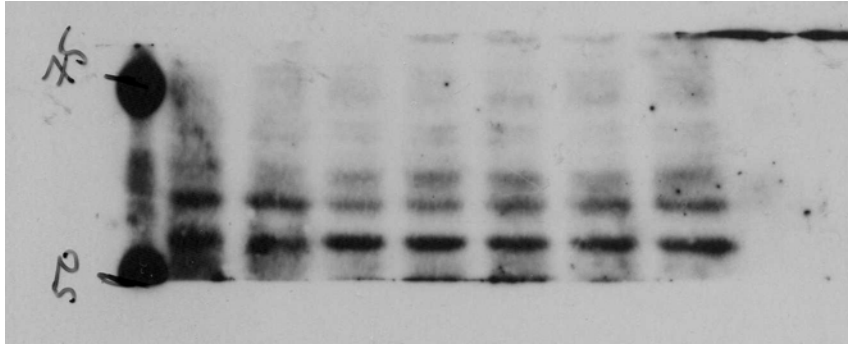

Smad2/3

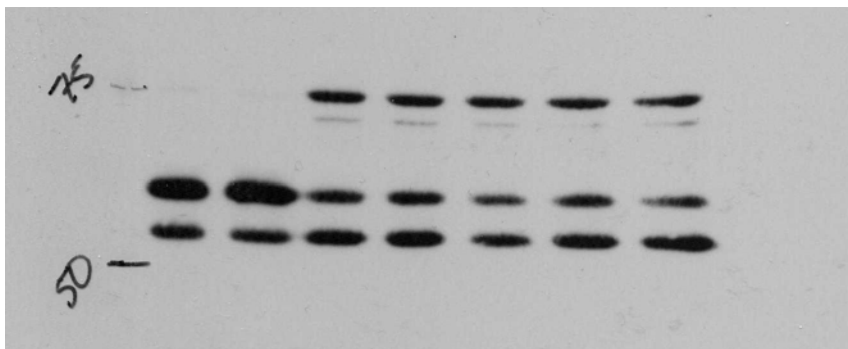

$\alpha$ -subunit  
Na<sup>+</sup>/K<sup>+</sup> ATPase

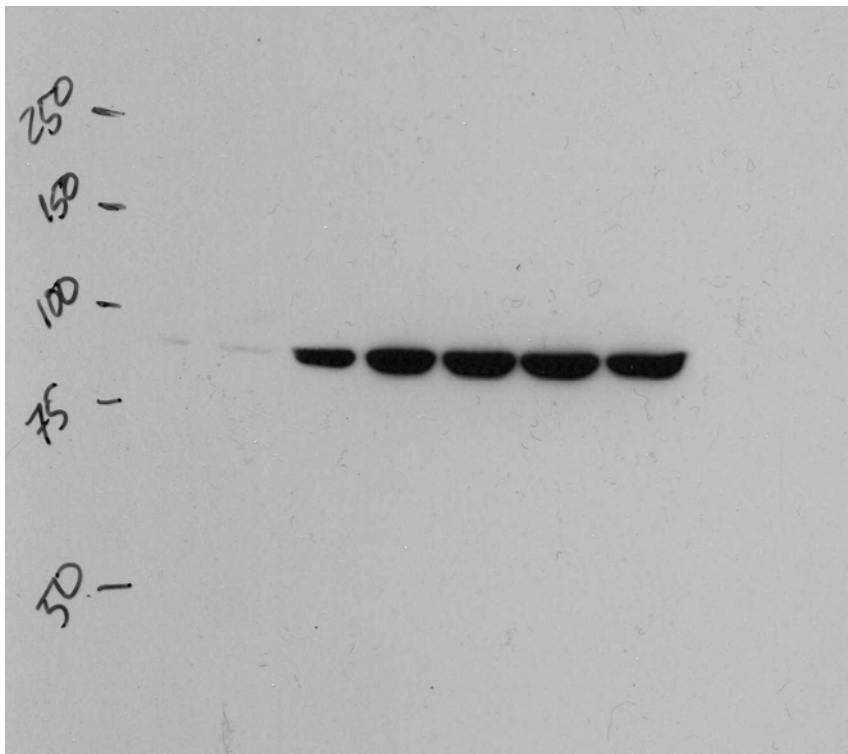

Supplement: pone.0123600.s004.pdf [file pone.0123600.s004.pdf]
